# Supplementary material for: An ancestral stomatal patterning module revealed in the non-vascular land plant Physcomitrella patens
Source: Oxford University Press journal article supplement (doi:10.1242/dev.135038), 2016-01-01
Supplement: dev135038supp.pdf [file dev135038supp.pdf]

A

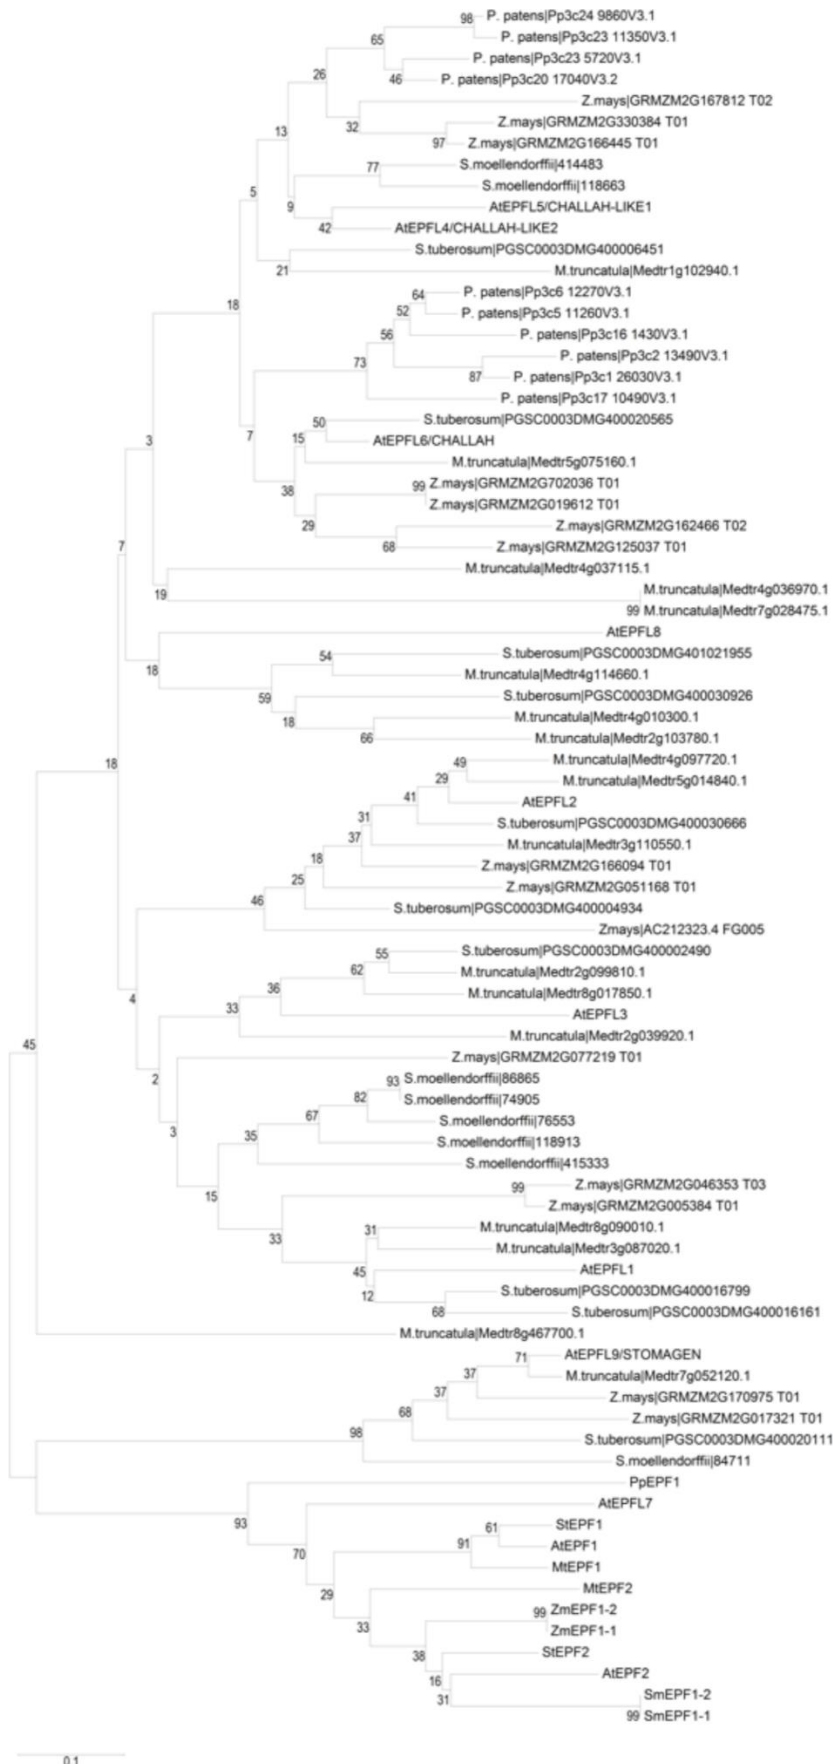

**B**

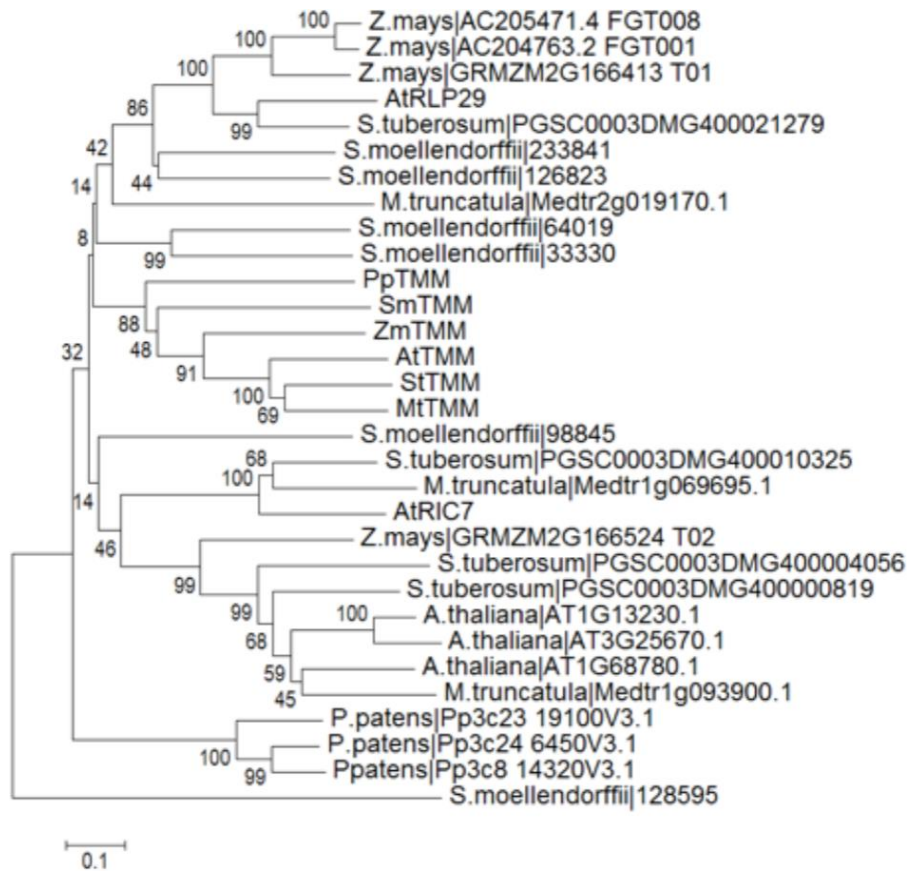

C

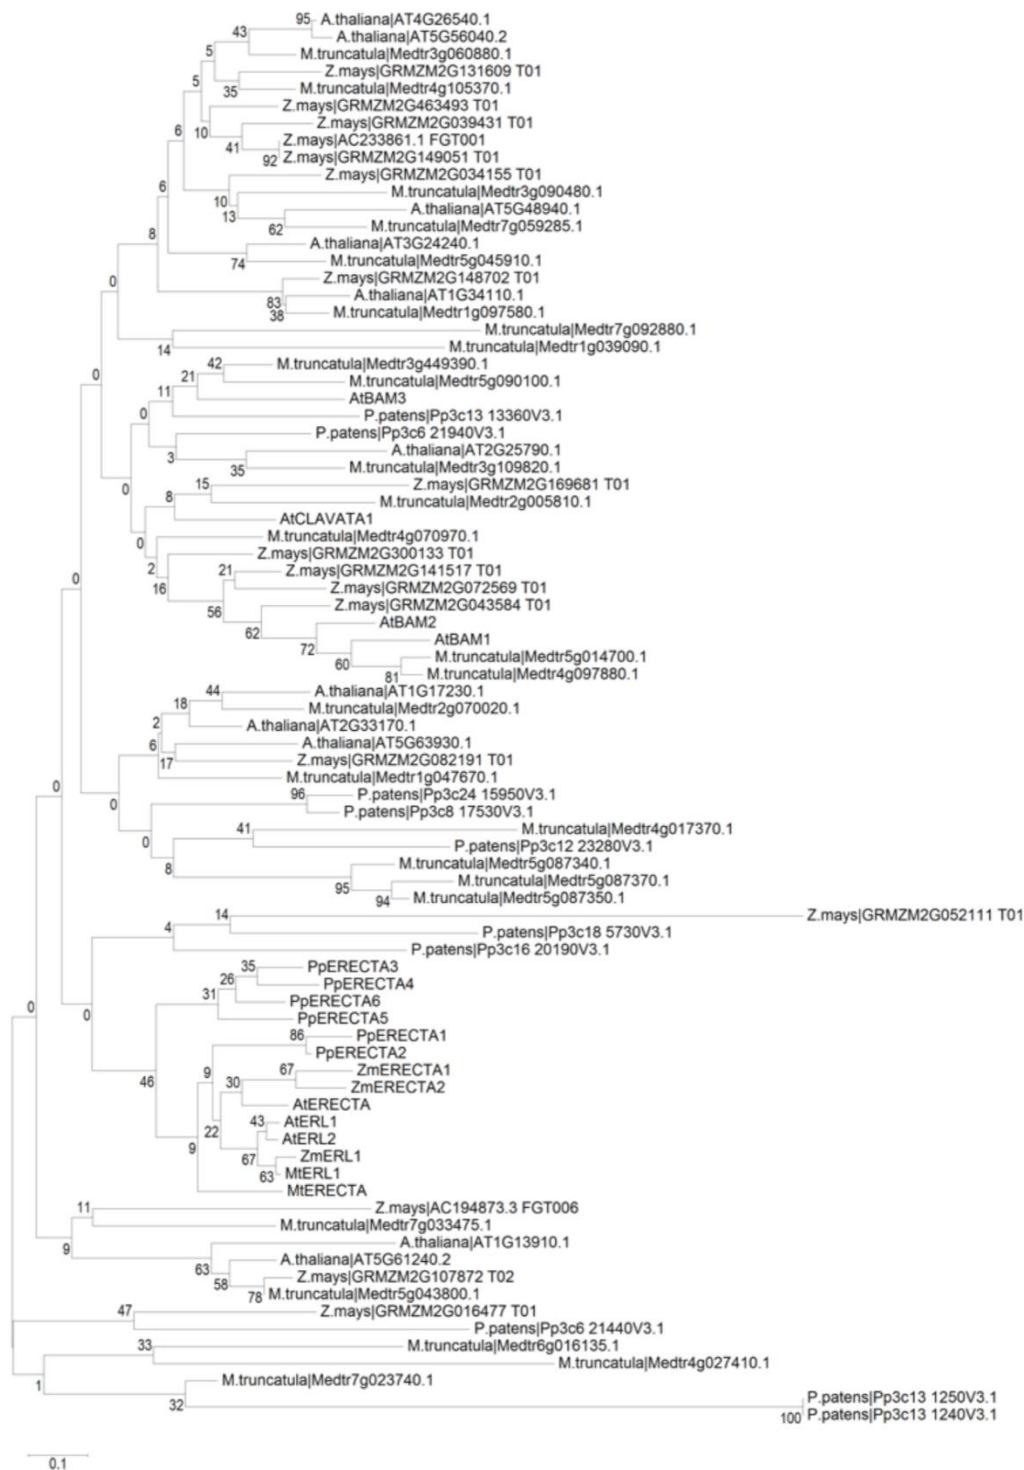

**Fig. S1 Extended phylogenetic trees for EPF, TMM and ERECTA gene families**  
 Evolutionary relationships of (A) Epidermal Patterning Factor (EPF) and Epidermal Patterning Factor-like (EPFL) genes; (B) TOO MANY MOUTHS (TMM) genes; and (C) ERECTA and ERECTA-like genes based on amino acid sequence alignments from selected land plant lineages. Gene family members related to *A. thaliana* EPF1, TMM and ERECTA from *P. patens*, *S. moellendorffii*, *Z. mays*, *S. tuberosum*, *M. truncatula* and *A. thaliana* (as indicated) were identified via phytozome gene family predictions and manual methods (Goodstein et al., 2012). For the ERECTA phylogeny *S. moellendorffii* and *S. tuberosum* have been emitted from the analysis due to the large number of gene representatives overall in this family. See Table S1 for accession numbers not indicated in the trees.

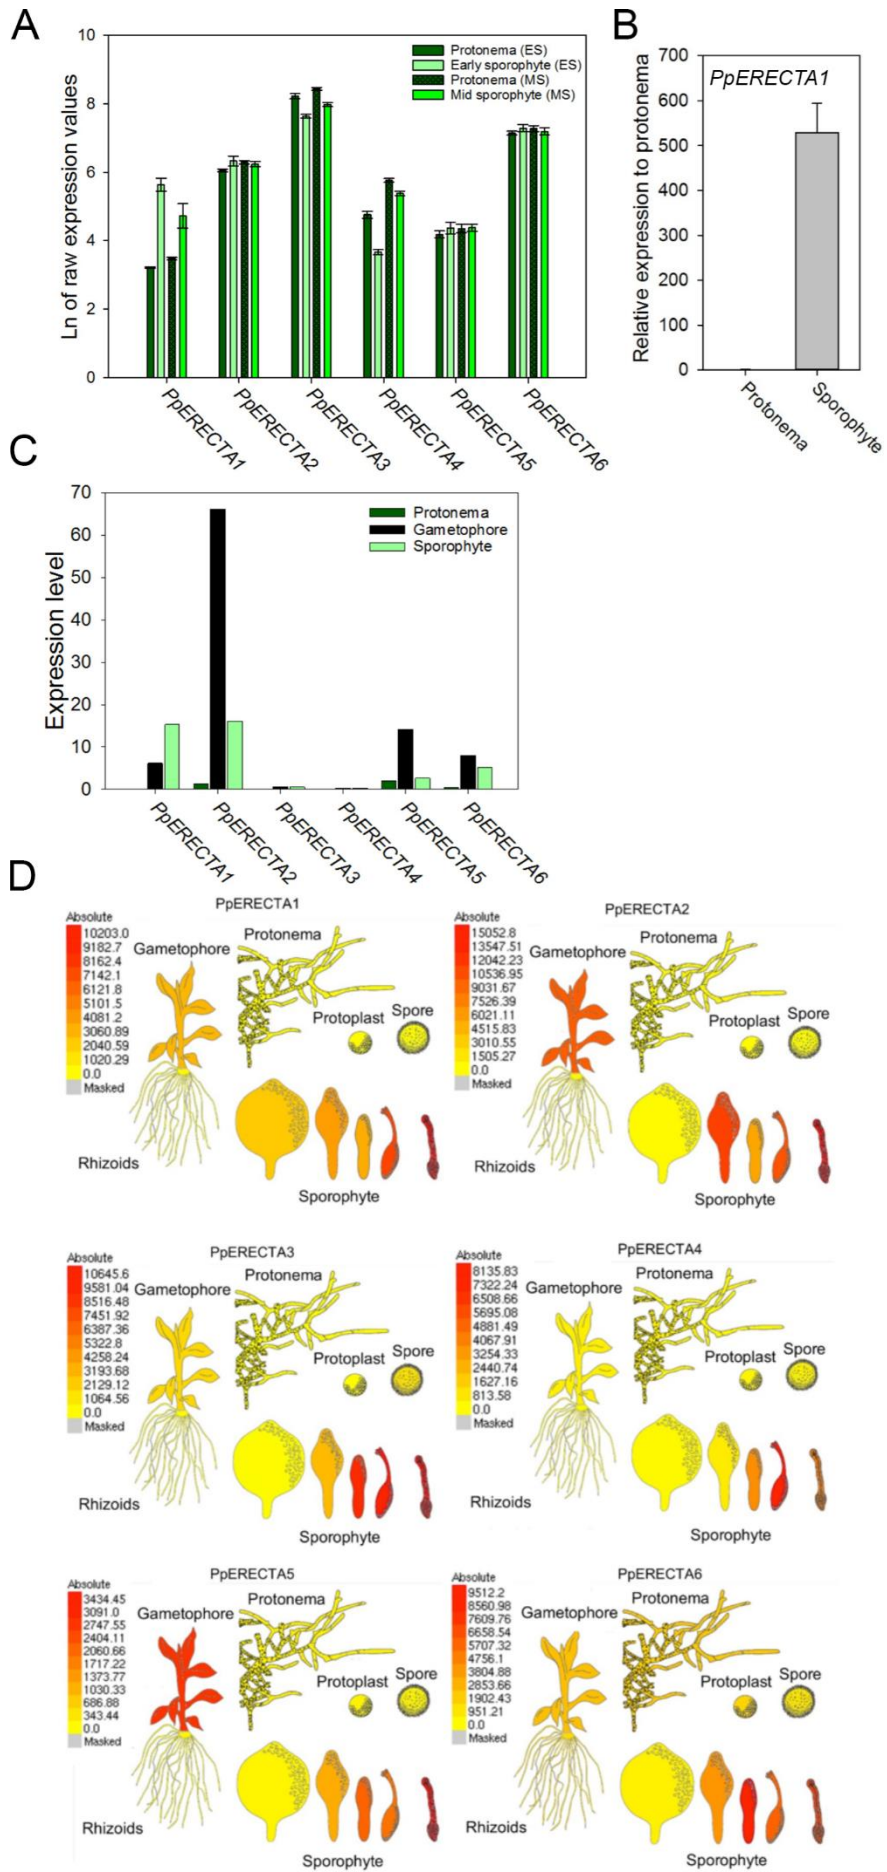

**Fig. S2** Expression profiles of *PpERECTA* genes.

(A) Expression levels of 6 *PpERECTA* genes in early (ES) and mid-stage (MS) sporophytes derived from microarray data (O'Donoghue et al, 2013). The expression in each sporophyte stage can be compared with the transcript level in protonema taken from the equivalent colony stage.

(B) qPCR analysis of *PpERECTA1* expression in protonemal and sporophyte tissue. Expression relative to an actin control gene has been set at 1 for the protonemal tissue, indicating a 500-fold relative increase in *PpERECTA1* expression in the sporophyte.

(C) Expression levels of 6 *PpERECTA* genes in protonema, gametophores and sporophytes. Data derived from the Phytozome gene atlas (vs 11) (Goodstein et al., 2012)

(D) Expression profiles of 6 *PpERECTA* genes derived from microarray data on the *P. patens* eFP browser (Ortiz-Ramirez et al., 2016) for spore, protoplast, protonemal, gametophyte and sporophyte tissue. Absolute expression values are provided to illustrate differential expression between related *PpERECTA* family members. See Table S1 for relevant accession numbers.

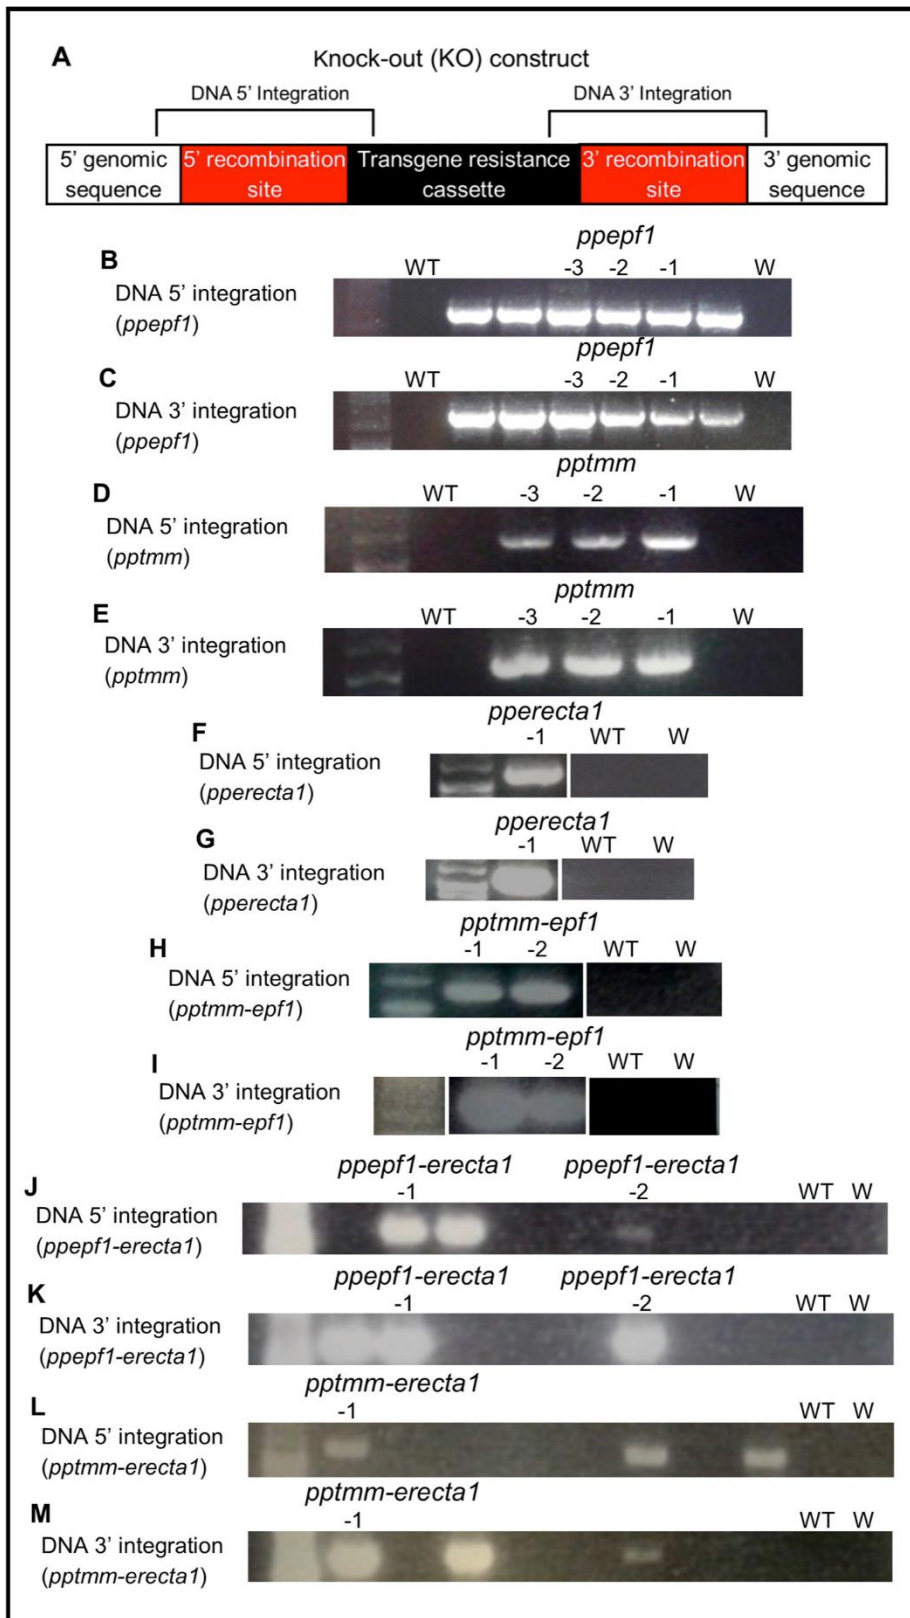

**Fig. S3** Molecular analysis of gene knock-out lines

(A) Schematic of approach taken to confirm gene knock-outs. To verify 5' genomic integration, PCR was performed on mutant lines targeting a fragment spanning from the 5' genomic sequence to the transgene resistance cassette. To verify 3' genomic integration, PCR was performed to verify the presence of a fragment spanning from the transgene resistance cassette to the 3' genomic sequence. (B-M) Gel images of PCR products illustrating targeted integration of the KO construct at both the 5' and 3' regions of the genomic loci of mutants: *ppepf1* (B,C); *pptmm* (D,E); *pperecta1* (F,G); *pptmm-epf1* (H,I); *ppepf1-erecta1* (J,K); and *pptmm-erecta1* (L,M). Each lane with a number indicates an individual line taken forward and used for phenotypic analysis. Lanes showing a band but no number indicate potential KO lines obtained but not taken forward for phenotyping. WT refers to a Wild-type sample DNA and W refers to a water sample control. Ladders are included on the left of each gel shot but owing to variation in exposure are not always visible. Primers used are listed in Table S2.

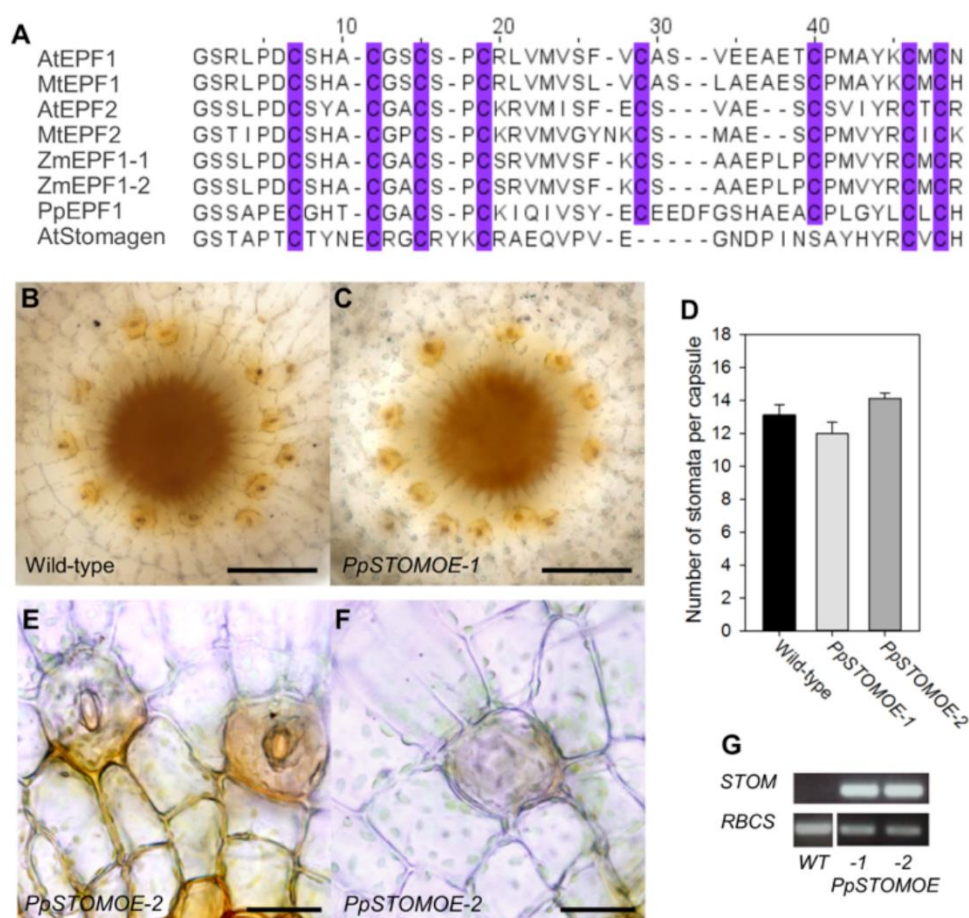

**Fig. S4** Overexpression of *STOMAGEN* (*AtEPFL9*) does not disrupt stomatal patterning in *Physcomitrella patens*.

(A) Sequence alignment of EPF peptides. Conserved amino acids are highlighted in purple. (B,C) Bright field images of the base of the sporophyte from (B) WT and (C) PpSTOMOE-1 plants (D) Number of stomata per capsule in wild-type and two PpSTOMOE lines. No significant difference ( $P < 0.05$ ) was found between the lines (oneway ANOVA with multiple comparisons corrected using a Dunnett's test,  $n=7$ ). (E,F) Images showing abnormal cell division patterns at the base of sporophytes in PpSTOMOE lines. (G) RT-PCR analysis of *STOMAGEN* transcript accumulation (upper panel) in two PpSTOMOE lines and WT tissue, and transcript detection for a control RBCS gene (lower panel).

Scale bars: B,C= 100 $\mu$ m; E,F = 25 $\mu$ m; Error bars in D = s.e.m.



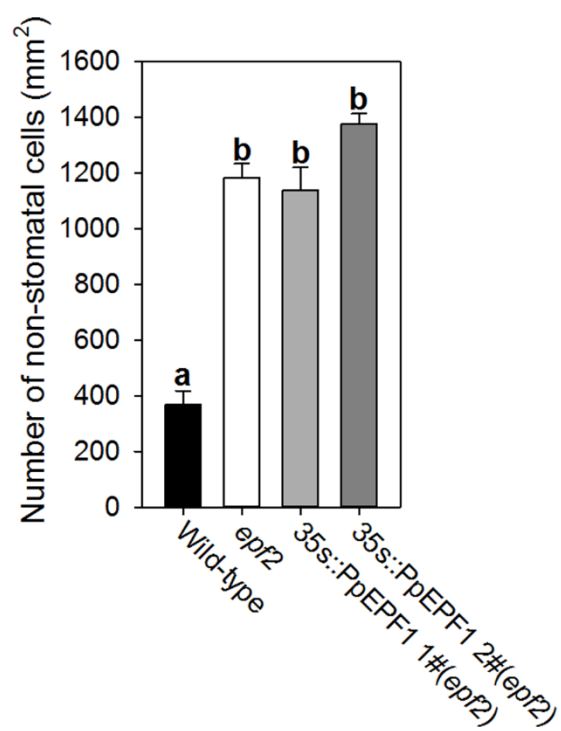

**Fig. S5.** Expression of *PpEPF1* in the Arabidopsis *epf2* background does not restore WT epidermal cell density. There is a significant increase in epidermal cell density relative to WT in both the *epf2* mutant and in two lines of the *epf2* mutant overexpressing *PpEPF1* (One-Way ANOVA with multiple comparisons corrected with a Dunnett test,  $n=6$ ,  $p < 0.001$  for columns indicated with different letters).

**Table S1. Accession numbers relating to gene identifiers used in the phylogenetic analyses.**  
For *P. patens* both V3.3 and V1.6 identifiers are provided.

| Gene identifier    | Accession 1          | Accession 2     |
|--------------------|----------------------|-----------------|
| PpEPF1             | Pp3c6_27020V3.1      | Pp1s279_24V6.1  |
| PpCHALLAH-related1 | Pp3c23_5720V3.1      | Pp1s16_10V6.1   |
| PpCHALLAH-related2 | Pp3c24_9860V3.1      | Pp1s196_93V6.1  |
| PpCHALLAH-related3 | Pp3c23_11350V3.1     | Pp1s137_142V6.1 |
| PpCHALLAH-related4 | Pp3c17_10490V3.1     | Pp1s105_161V6.1 |
| PpCHALLAH-related5 | Pp3c5_11260V3.1      | Pp1s263_75V6.1  |
| PpCHALLAH-related6 | Pp3c6_12270V3.1      |                 |
| PpCHALLAH-related7 | Pp3c16_1430V3.1      | Pp1s144_136V6.1 |
| PpCHALLAH-related8 | Pp3c2_13490V3.1      | Pp1s30_64V6.1   |
| PpCHALLAH-related9 | Pp3c1_26030V3.1      | Pp1s21_79V6.1   |
| ZmEPF1-1           | GRMZM2G177393        |                 |
| ZmEPF1-2           | GRMZM2G431783        |                 |
| MtEPF1             | Medtr2g090220.1      |                 |
| MtEPF2             | Medtr2g067510.1      |                 |
| StEPF1             | PGSC0003DMG400007864 |                 |
| StEPF2             | PGSC0003DMG400027541 |                 |
| AtEPF1             | AT2G20875.1          |                 |
| AtEPF2             | AT1G34245.1          |                 |
| AtEPFL1            | AT5G10310.1          |                 |
| AtEPFL2            | AT4G37810.1          |                 |
| AtEPFL3            | AT3G13898.1          |                 |
| AtEPFL4/CLL2       | AT4G14723.1          |                 |
| AtEPFL5/CLL1       | AT3G22820.1          |                 |
| AtEPFL6/AtCHALLAH  | AT2G30370.1          |                 |
| AtEPFL7            | AT1G71866.1          |                 |
| AtEPFL8            | At1g80133.1          |                 |
| AtEPFL9/AtSTOMAGEN | AT4G12970.1          |                 |
| AtCLAVATA3         | AT2G27250.3          |                 |
| PpTMM              | Pp3c3_3780V3.1       | Pp1s1_587V6     |
| SmTMM              | 125817               |                 |
| ZmTMM              | GRMZM2G011401        |                 |
| MtTMM              | Medtr2g103940.1      |                 |
| StTMM              | PGSC0003DMG400028627 |                 |
| AtTMM              | AT1G80080.1          |                 |
| AtRLP29            | AT2G42800.1          |                 |
| AtRIC7             | AT4G28560.1          |                 |
| PpERECTA1          | Pp3c2_22410V3.1      | Pp1s125_96V6.1  |
| PpERECTA2          | Pp3c1_17360V3.1      | Pp1s63_16V6.1   |
| PpERECTA3          | Pp3c21_9500V3.1      | Pp1s353_18V6    |
| PpERECTA4          | Pp3c18_10870V3.1     | Pp1s19_291V6    |
| PpERECTA5          | Pp3c22_10630V3.1     | Pp1s121_69V6    |
| PpERECTA6          | Pp3c19_15110V3.1     | Pp1s20_166V6    |
| ZmERECTA1          | GRMZM2G463904        |                 |
| ZmERECTA2          | GRMZM5G809695        |                 |
| ZmERL1             | GRMZM2G082855        |                 |

|            |                 |  |
|------------|-----------------|--|
| MtERECTA   | Medtr1g015530.1 |  |
| MtERL1     | Medtr1g102500.1 |  |
| AtERECTA   | AT2G26330.1     |  |
| AtERL1     | AT5G62230.1     |  |
| AtERL2     | AT5G07180.1     |  |
| AtBAM1     | AT5G65700.1     |  |
| AtBAM2     | AT3G49670.1     |  |
| AtBAM3     | AT4G20270.1     |  |
| AtCLAVATA1 | AT1G75820.1     |  |

**Table S2.** Primers used in this study

| Primer name               | Sequence                      |
|---------------------------|-------------------------------|
| 5' PpEPF1 3' F            | CTCTCACTCCTCAATACACGTG        |
| 5' PpEPF1 3' R            | GCAACAAACGTCATTTCCAA          |
| PpEPF1 KO CONSTRUCT F     | AGCGCAATCCACATACGAAACT        |
| PpEPF1 KO CONSTRUCT R     | GGGTTGGGCGAAGGTTTTATATT       |
| Flanking PpTMM 5' F       | GTGCATTAACGGTGCATTGAAA        |
| Flanking PpTMM 5' R       | GCATCTGACACGAAATGTCACAG       |
| Flanking PpTMM 3' F       | TTCAACCTTCCCAATGCACCTAT       |
| Flanking PpTMM 3' R       | CACTCATACTTTTGGACCGATGC       |
| PpTMM KO CONSTRUCT F      | GATGGAGGTGGTCCTACGAGAG        |
| PpTMM KO CONSTRUCT R      | GCGGATTGATAAATTGGCGTTA        |
| Flanking PpERECTA1 5' F   | CTCGCTCTCTCTTTCCTGG           |
| Flanking PpERECTA1 5' R   | ATCGCCATGACAGGGAGTAG          |
| Flanking PpERECTA1 3' F   | TCCACTCCACTTCCCATTCT          |
| Flanking PpERECTA1 3' R   | GGTGACTTCCTATCATGCGC          |
| PpERECTA1 KO CONSTRUCT F  | CTCGCTCTCTCTTTCCTGG           |
| PpERECTA1 KO CONSTRUCT R  | GGTGACTTCCTATCATGCGC          |
| PpEPF1 OE F               | GCCTTATTGACATGGCTGCT          |
| PpEPF1 OE R               | TCAAGGGATGGGAAAGGATT          |
| PpTMM OE F                | ATTGTGGTAGTGTACGAGGTAGGC      |
| PpTMM OE R                | TTAGCACCTTGACATGATTACGA       |
| AtSTOMAGEN OE F           | AAGCATGAAATGATGAACATCAAG      |
| AtSTOMAGEN OE R           | TTATCTATGACAAACACATCTATAATGAT |
| M13 F                     | GTA AACGACGGCCAGT             |
| M13 R                     | CAGGAAACAGCTATGAC             |
| PpEPF1 OE CONSTRUCT F     | ACCATGAGCAACGAGCTGAA          |
| PpEPF1 OE CONSTRUCT R     | AACAGCACATAGGCCGACAA          |
| PpTMM OE CONSTRUCT F      | ACCATGAGCAACGAGCTGAA          |
| PpTMM OE CONSTRUCT R      | TGCCTCGGTAACATCTTCAGG         |
| AtSTOMAGEN OE CONSTRUCT F | GGTCGATCTGGTTGTA CTGAGG       |
| AtSTOMAGEN OE CONSTRUCT R | AACAGCACATAGGCCGACAA          |
| PpEPF1 RT-PCR F           | CCGCGTCATACTTGGAACTG          |
| PpEPF1 RT-PCR R           | CAAGTAGCCCAACGGACAAG          |
| PpEPF1 OE RT-PCR F        | TCCAAGATAGAGACTGAGGGG         |
| PpEPF1 OE RT-PCR R        | TCCTCGCATT CATAGCTCACAA       |
| PpTMM RT-PCR F            | TGGCGCAC AACAGATTCTCAGG       |
| PpTMM RT-PCR R            | AGCCTTCGTTGTTCTGCAGTCG        |
| PpTMM OE RT-PCR F         | CTCCAACAACCAAAGCGTCG          |
| PpTMM OE RT-PCR R         | AACGCTGGTTTTAAGCTGCC          |
| PpERECTA1 RT-PCR F        | TAAGCGAGAAGTACGTGGCA          |
| PpERECTA1 RT-PCR R        | GGATAACTGGGAGGTTTGCG          |
| PpAtSTOMAGEN OE RT-PCR F  | GTTCAAGCCTCAAGACCTCG          |
| PpAtSTOMAGEN OE RT-PCR R  | CCTTCGACTGGA ACTTGCTC         |
| PpRubisco RT-PCR F        | TTGTGGCTCCTGTCTCTGTG          |
| PpRubisco RT-PCR R        | CGAGAAGGTCTCGAACTTGG          |
| PpEPF1 comp AtEPF1 F      | CACCATGGCCTTATTGACATGG        |
| PpEPF1 comp AtEPF1 R      | TCAAGGGATGGGAAAGGAT           |
| pAtTMM F                  | CACCATAACAATCCATGATGCTGCTT    |
| pAtTMM R                  | CATTTCTTAGTTGTTGTTGTTGTGT     |
| PpTMM comp AtTMM F        | CACCATGATTGTGGTAGTGTACG       |
| PpTMM comp AtTMM R        | TTAGCACCTTGACATGATTACGAG      |

|                                             |                          |
|---------------------------------------------|--------------------------|
| qPCR PpERECTA1 F                            | CTTCGGTATTGTGCTGCTGG     |
| qPCR PpERECTA1 R                            | CTTCGCACACAACAACGCTA     |
| qPCR Adenine<br>phosphoribosyltransferase F | AGTATAGTCTAGAGTATGGTACCG |
| qPCR Adenine<br>phosphoribosyltransferase R | TAGCAATTTGATGGCAGCTC     |
| qPCR Small Ribosomal F                      | ACGGACATTGCATTTAAGACCT   |
| qPCR Small Ribosomal R                      | GTCGATTACCTGTGGAGAAGAC   |
| qPCR Large Ribosomal F                      | GACAGGCACAGGGTATTCCCT    |
| qPCR Large Ribosomal R                      | ATCTTCCGTCGTGTTGATCC     |
